# Supplementary material
Source: publisher figshare collection journal article supplement (https://acs.figshare.com/ndownloader/files/5575385)
Supplement: Supplementary file 1 [file 5575385]

## Supporting Information

---

**“The golden method”: electrochemical is an efficient route to gold complexes**

---

*Luis M. González-Barcia, María J. Romero\* Ana M. González Noya, Manuel R. Bermejo, Marcelino Maneiro, Guillermo Zaragoza and Rosa Pedrido\**

## Experimental Section

### Materials

All solvents, 2-(diphenylphosphino)benzaldehyde, 4-methoxyphenyl isothiocyanate, 4-nitrophenyl-3-thiosemicarbazide, hydrazine monohydrate, gold plate, gold(III) chloride hydrate, and 2,2'-thiodiethanol are commercially available and were used without further purification.

### Physical Measurements

Elemental analysis of C, H, N and S were performed on a FISOONS EA 1108 analyzer.  $^1\text{H}$  NMR spectra were recorded on a Varian Mercury 300 spectrometer;  $^{13}\text{C}$  and  $^{31}\text{P}$  NMR spectra ( $\text{H}_3\text{PO}_4$  was used as internal reference) were recorded on a Bruker DRX-500 MHz spectrometer.  $\text{DMSO-d}_6$  was employed as deuterated solvent and chemical shifts were expressed relative to tetramethylsilane. Infrared spectra were measured from KBr pellets on a BRUKER IFS-66V spectrophotometer in the ranges 4000-100 or 500-100  $\text{cm}^{-1}$ . Electrospray ionization mass spectra ( $\text{ESI}^+$ ) were recorded on an API4000 Applied Biosystems mass spectrometer with Triple Quadrupole analyser.

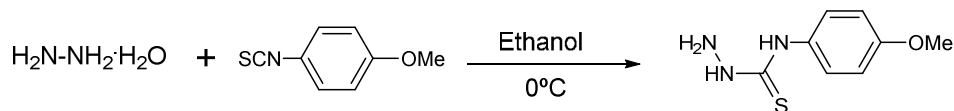

**Scheme S1.** Synthesis of the 4-methoxyphenylthiosemicarbazide

### Synthesis of 4-methoxyphenylthiosemicarbazide

Hydrazine monohydrate (1.52 g, 30 mmol) was slowly added to a solution of 4-methoxyphenyl-isothiocyanate (2.47 g, 15 mmol) in absolute ethanol (20 mL) with stirring at 0 °C (ice bath). After 1 hour the white solid was filtered off, washed with ethanol and diethyl ether and dried under vacuum.

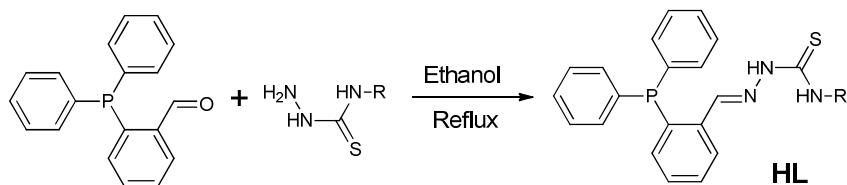

**Scheme S2.** Synthesis of the ligands  $\text{HL}^n$  ( $\text{HL}^1$ ,  $\text{R} = \text{Me}$ ;  $\text{HL}^2$ ,  $\text{R} = \text{Et}$ ;  $\text{HL}^3$ ,  $\text{R} = \text{Ph}$ ;  $\text{HL}^4$ ,  $\text{R} = \text{PhOMe}$ ;  $\text{HL}^5$ ,  $\text{R} = \text{PhNO}_2$ )

### Synthesis of the ligands HL<sup>n</sup>

(HL<sup>1</sup>, R = Me; HL<sup>2</sup>, R = Et; HL<sup>3</sup>, R = Ph; HL<sup>4</sup>, R = PhOMe; HL<sup>5</sup>, R = PhNO<sub>2</sub>)

All ligands were synthesised following the same procedure. We must point out herein that HL<sup>1</sup>, HL<sup>2</sup> and HL<sup>3</sup> were previously reported.<sup>1-3</sup> For that reason we have included here the experimental data for HL<sup>4-5</sup> only. As an example, we can see below the synthesis of HL<sup>4</sup>.

The ligand 4-methoxyphenylthiosemicarbazone, HL<sup>4</sup>, was prepared by condensation of 2-diphenylphosphinobenzaldehyde (1.0 g, 3.4 mmol) with 4-methoxyphenyl-thiosemicarbazide (0.7 g, 3.4 mmol) in absolute ethanol (25 mL). The solution was heated under reflux for 4 h and concentrated with a Dean–Stark trap. The yellow precipitate was collected by filtration. The resulting solid was finally washed with diethyl ether (3 × 10 mL) and dried *in vacuo*.

**HL<sup>4</sup>.** Yellow solid. Yield 1.076 g (67 %); m.p.= 161-163 °C; E.A. (Found: C, 68.8; H, 5.3; N, 8.9; S, 6.6; C<sub>27</sub>H<sub>24</sub>N<sub>3</sub>OPS required: C, 69.1; H, 5.2; N, 8.9; S, 6.8); ESI<sup>+</sup> MS (m/z) 470.1 [HL + H]<sup>+</sup>; <sup>1</sup>H NMR (300 MHz, DMSO-d<sub>6</sub>, ppm): δ 11.86 (s, 1H<sub>a</sub>), 9.77 (s, 1H<sub>b</sub>), 8.75 (d, J= 4.7 Hz, 1H<sub>c</sub>), 8.30 (dd, J<sub>1</sub>= 7.5 Hz, J<sub>2</sub>= 3.7 Hz, 1H<sub>d</sub>), 7.34-7.49 (m, 11H), 7.12-7.26 (m, 4H), 6.91 (d, J = 8.7 Hz, 1H), 6.79 (dd, J<sub>1</sub> = 6.6 Hz, J<sub>2</sub>= 4.8 Hz, 1H), 3.75 (s, 3H); <sup>13</sup>C NMR (126 MHz, DMSO-d<sub>6</sub>, ppm): δ 176.69 (C=S), 157.42 (C<sub>ar</sub>-OCH<sub>3</sub>), 141.22 (C=N), 137.95-127.92 (C<sub>ar</sub>), 55.68 (O-CH<sub>3</sub>); <sup>31</sup>P NMR (202 MHz, DMSO-d<sub>6</sub>, ppm): δ -12.30; IR (KBr, cm<sup>-1</sup>): ν(NH) 3229, 3155, ν(C=N) + ν(C-N) 1595, 1547, 1506, ν(C=S) 1090, 802, ν(N-N) 1037.

**HL<sup>5</sup>.** Yellow solid. Yield 1.498 g (92%); m.p.= 240-242 °C; E.A. (Found: C, 64.3; H, 4.6; N, 11.4; S, 6.3; C<sub>26</sub>H<sub>21</sub>N<sub>4</sub>O<sub>2</sub>PS required: C, 64.5; H, 4.4; N, 11.6; S, 6.6; ESI<sup>-</sup> MS (m/z) 483.1 [L]<sup>-</sup>; 499.1 [L + O]<sup>-</sup>; <sup>1</sup>H NMR (500 MHz, DMSO-d<sub>6</sub>, ppm): δ 12.30 (s, 1H<sub>a</sub>), 10.33 (s, 1H<sub>b</sub>), 8.88 (d, J= 4.9 Hz, 1H<sub>c</sub>), 8.35 (dd, J<sub>1</sub>= 7.3 Hz, J<sub>2</sub>= 4.1 Hz, 1H<sub>d</sub>), 8.24-7.21 (m, 16H), 6.81 (dd, J<sub>1</sub>= 6.9 Hz, J<sub>2</sub>= 4.4 Hz, 1H); <sup>13</sup>C NMR (126 MHz, DMSO-d<sub>6</sub>, ppm): δ 175.24 (C=S), 144.89 (C=N), 143.14-123.42 (C<sub>ar</sub>); <sup>31</sup>P NMR (202 MHz, DMSO-d<sub>6</sub>, ppm): δ -12.76; IR (ATR, cm<sup>-1</sup>): ν(NH) 3302, ν(NH) 3196, ν(C=N) + ν(C-N) 1597, 1539, 1514, ν(NO<sub>2</sub>) 1333, ν(C=S) 1111, 851.

### Electrochemical synthesis of gold(I) complexes

All syntheses were performed under the same experimental conditions: 0.1 g of ligand electrolysed at 5 mA (10.5-13.5 V) under argon atmosphere. As example we detail below the experimental procedure for the complex  $[\text{Au}_2(\text{L}^1)_2]$ .

#### Electrochemical synthesis of $[\text{Au}_2(\text{L}^1)_2]$

A suspension of the ligand  $\text{HL}^1$  (0.1 g, 0.265 mmol) containing tetraethylammonium perchlorate as supporting electrolyte, a platinum wire as cathode and a gold plate as anode, was electrolysed in degassed acetonitrile (80 mL) for 85 min. The reaction was carried out at 5 mA (10.5 V) under argon atmosphere. The resulting yellow solution was concentrated under reduced pressure until half volume. Slow evaporation from the mother liquors afforded single crystals suitable for X-ray diffraction studies that were filtered, washed with diethyl ether and dried in vacuo, providing 0.093 g of a yellow crystalline product. The structure of this complex was found to be  $[\text{Au}_2(\text{L}^1)_2]$  (**1**).

**\*Caution!** Perchlorate salts are potentially explosive and should be handled with care.

**$[\text{Au}_2(\text{L}^1)_2]$ .** Yellow solid. Yield 0.093 g (61%); E.A. (Found: C, 44.0; N, 7.5; H, 3.2; S, 5.4; calculated for  $\text{Au}_2\text{C}_{42}\text{H}_{38}\text{N}_6\text{P}_2\text{S}_2$ : C, 43.9; N, 7.3; H, 3.3; S, 5.6; MALDI-TOF MS ( $m/z$ ) 949.1  $[\text{ML}_2 + \text{H}]$ , 1270.1  $[\text{M}_2\text{L}_2] \cdot 3\text{CH}_3\text{CN}$ ;  $^1\text{H}$  NMR (300 MHz, DMSO- $d_6$ , ppm):  $\delta$  8.21 (s, 1H,  $\text{H}_c$ ), 7.72 (s, 1H), 7.57-7.33 (m, 13 $\text{H}_{\text{Ar}}$ ), 7.02 (m, 1H,  $\text{H}_b$ ), 2.75 (d, 3H,  $J = 4.6$  Hz);  $^{31}\text{P}$  NMR (202 MHz, DMSO- $d_6$ , ppm):  $\delta$  33.7. IR (KBr,  $\text{cm}^{-1}$ ):  $\nu(\text{OH})$  3432,  $\nu(\text{C}=\text{N}) + \nu(\text{C}-\text{N})$  1540, 1461, 1436,  $\nu(\text{C}=\text{S})$  1097, 791,  $\nu(\text{N}-\text{N})$  1045.

**$[\text{Au}_2(\text{L}^2)_2] \cdot 2\text{H}_2\text{O}$ .** Yellow solid. Yield 0.1 g (66%); E.A. (Found: C, 44.9; H, 3.8; N, 7.0; S, 5.3; calculated for  $\text{Au}_2\text{C}_{44}\text{H}_{42}\text{N}_6\text{P}_2\text{S}_2$ : C, 45.0; H, 3.6; N, 7.1; S, 5.4; MALDI-TOF MS ( $m/z$ ) 588.1  $[\text{ML}]$ , 1175.0  $[\text{M}_2\text{L}_2]$ ,  $^1\text{H}$  NMR (300 MHz, DMSO- $d_6$ , ppm): 8.56 (s, 1H,  $\text{H}_c$ ), 8.32-6.11 (m, 14 $\text{H}_{\text{Ar}}$  +  $\text{H}_b$ ), 3.27 (q, 2H), 1.14 (t, 3H);  $^{31}\text{P}$  NMR (202 MHz, DMSO- $d_6$ , ppm):  $\delta$  33.9; IR (KBr,  $\text{cm}^{-1}$ ):  $\nu(\text{NH})$  3280,  $\nu(\text{C}=\text{N}) + \nu(\text{C}-\text{N})$  1479, 1457, 1434,  $\nu(\text{C}=\text{S})$  1120, 800.

**$[\text{Au}_2(\text{L}^3)_2]$ .** Yellow solid. Yield 0.084 g (60 %); E.A. (Found: C, 49.0; H, 3.5; N, 6.4; S, 4.8; calculated for  $\text{Au}_2\text{C}_{52}\text{H}_{42}\text{N}_6\text{P}_2\text{S}_2$ : C, 49.1; H, 3.3; N, 6.6; S, 5.0; ESI $^+$  MS ( $m/z$ ) 636.1  $[\text{ML} + \text{H}]^+$ , 1272.1  $[\text{M}_2\text{L}_2 + \text{H}]^+$ , 1467.1;  $^1\text{H}$  NMR (300 MHz, DMSO- $d_6$ , ppm):  $\delta$  8.54 (s, 1 $\text{H}_c$ ) 7.59-6.51 (m, 19 $\text{H}_{\text{Ar}}$  +  $\text{H}_b$ ),  $^{31}\text{P}$  NMR (202 MHz, DMSO- $d_6$ , ppm):  $\delta$  39.7; IR (KBr,  $\text{cm}^{-1}$ ):  $\nu(\text{NH})$  3282,  $\nu(\text{C}=\text{N}) + \nu(\text{C}-\text{N})$  1481, 1463, 1410,  $\nu(\text{C}=\text{S})$  1120, 796.

**$[\text{Au}_2(\text{L}^4)_2] \cdot 2\text{CH}_3\text{CN}$ .** Yellow solid. Yield 0.080 g (58%); E.A. (Found: C, 48.9; N, 7.7; H, 3.7; S, 4.4; calculated for  $\text{Au}_2\text{C}_{58}\text{H}_{52}\text{N}_8\text{O}_2\text{P}_2\text{S}_2$ : C, 49.3; N, 7.9; H, 3.7; S, 4.5; ESI-FIA-TOF $^+$  MS ( $m/z$ ) 666.1  $[\text{ML} + \text{H}]^+$ , 1331.0  $[\text{M}_2\text{L}_2 + \text{H}]^+$ ;  $^1\text{H}$  NMR (300 MHz, DMSO- $d_6$ , ppm):  $\delta$  9.00 (s, 1H,  $\text{H}_b$ ), 8.04 (s, 1H,  $\text{H}_c$ ), 7.77-6.58 (m, 18H), 3.66 (s, 3H);  $^{31}\text{P}$  NMR (202 MHz, DMSO- $d_6$ , ppm):  $\delta$  34.0.

IR (KBr,  $\text{cm}^{-1}$ ):  $\nu(\text{OH})$  3319,  $\nu(\text{C}=\text{N}) + \nu(\text{C}-\text{N})$  1510, 1479, 1437,  $\nu(\text{C}=\text{S})$  1097, 795,  $\nu(\text{N}-\text{N})$  1032. Slow evaporation from the mother liquors afforded yellow single crystals of  $[\text{Au}_2(\text{L}^4)_2] \cdot 2\text{CH}_3\text{CN}$  ( $2 \cdot 2\text{CH}_3\text{CN}$ ) suitable for X-ray diffraction studies.

**$[\text{Au}_2(\text{L}^5)_2]$ .** Yellow solid. Yield 0.071 g (51%); E.A. (Found: C, 45.7; H, 3.2; N, 8.2; S, 4.6; calculated for  $\text{Au}_2\text{C}_{52}\text{H}_{40}\text{N}_8\text{O}_4\text{P}_2\text{S}_2$ : C, 45.9; H, 3.0; N, 8.2; S, 4.7; MALDI-TOF MS ( $m/z$ ) 682.2  $[\text{ML}]$ , 1360.1  $[\text{M}_2\text{L}_2]$ ;  $^1\text{H}$  NMR (300 MHz,  $\text{DMSO}-d_6$ , ppm):  $\delta$  9.62 (s, 1H,  $\text{H}_b$ ), 8.95 (s, 1H,  $\text{H}_c$ ), 8.28-6.94 (m, 16H), 6.35 (dd, 2H,  $J_1 = 7.7$  Hz  $J_2 = 3.1$  Hz);  $^{31}\text{P}$  NMR (202 MHz,  $\text{DMSO}-d_6$ , ppm):  $\delta$  33.2, IR (KBr,  $\text{cm}^{-1}$ ):  $\nu(\text{OH})$  3402,  $\nu(\text{C}=\text{N}) + \nu(\text{C}-\text{N})$  1594, 1539 1495,  $\nu(\text{C}=\text{S})$  1110, 804,  $\nu(\text{N}-\text{N})$  1032

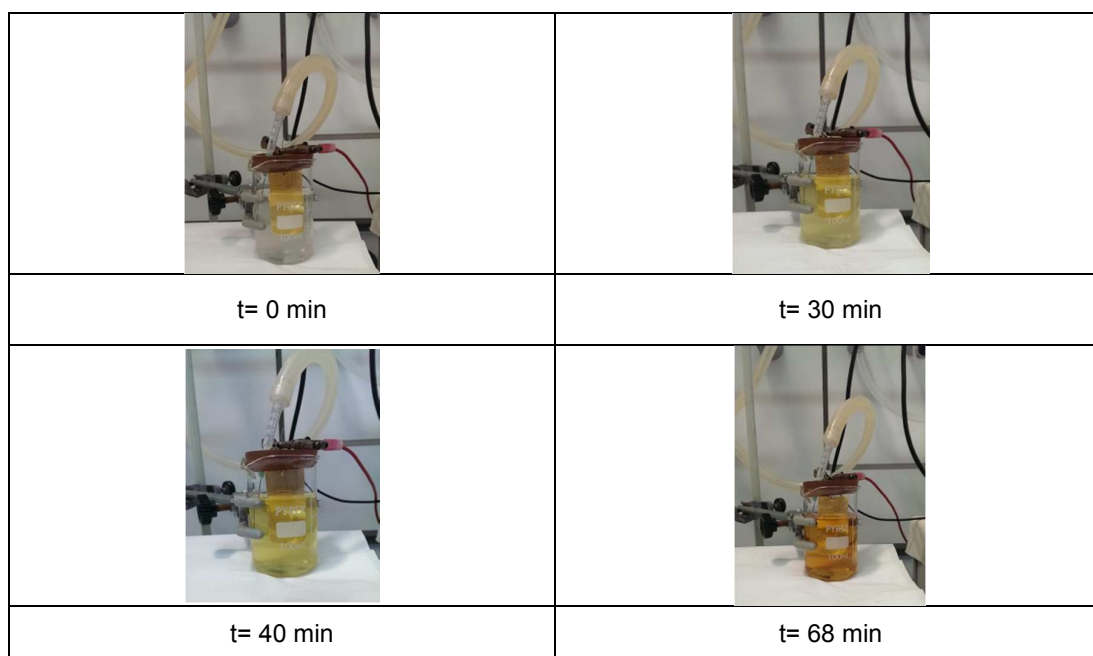

**Figure S1.** Evolution of the electrochemical cell during the synthesis of  $[\text{Au}_2(\text{L}^4)_2] \cdot 2\text{CH}_3\text{CN}$ .

|                                                                                     |                  |
|-------------------------------------------------------------------------------------|------------------|
| 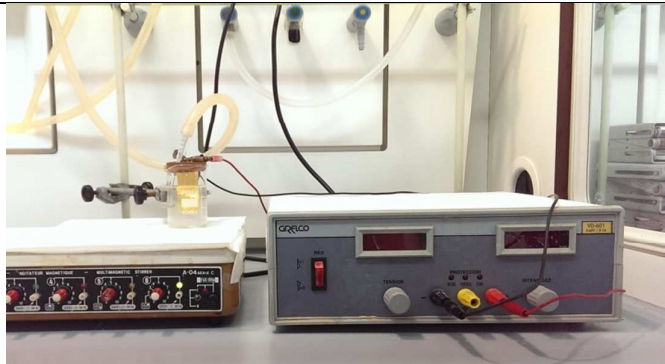   | <p>t= 0 min</p>  |
|    | <p>t= 30 min</p> |
|   | <p>t= 40 min</p> |
|  | <p>t= 68 min</p> |

**Figure S2.** Electrochemical parameters employed during the electrochemical synthesis of  $[\text{Au}_2(\text{L}^4)_2] \cdot 2\text{CH}_3\text{CN}$ .

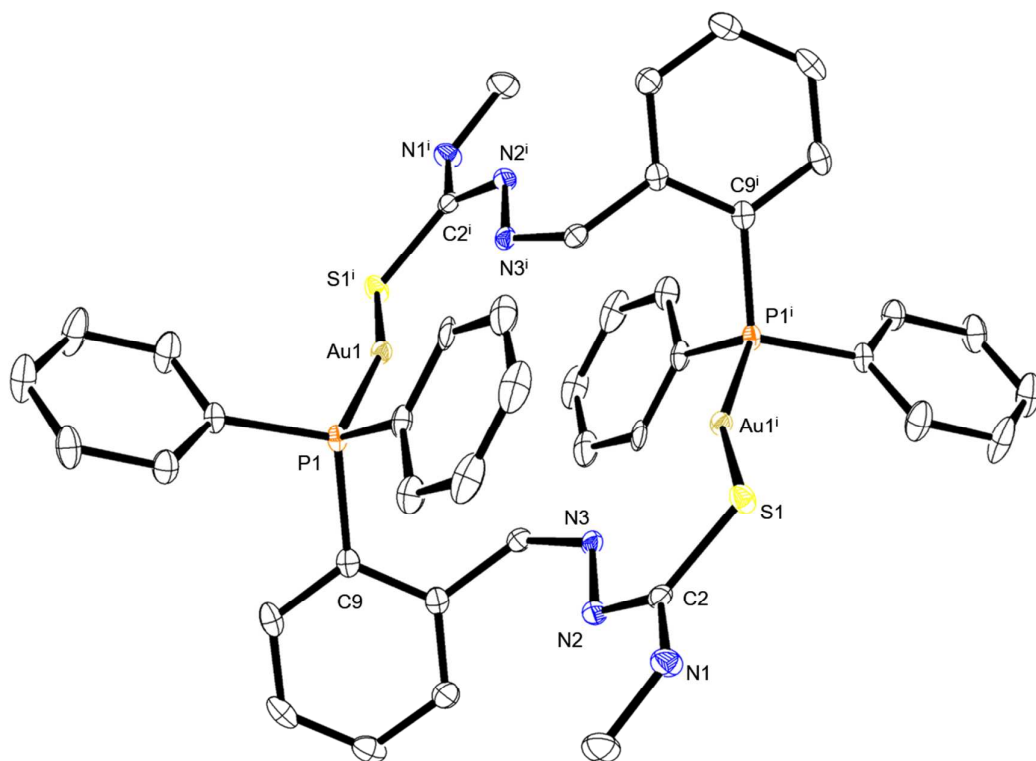

**Figure S3.** ORTEP depiction of the complex  $[\text{Au}_2(\text{L}^1)_2]$ . Hydrogen atoms have not been depicted for clarity.

| Bond distances (Å)                   |            |                     |            |                                      |            |
|--------------------------------------|------------|---------------------|------------|--------------------------------------|------------|
| P1—Au1                               | 2.2380 (7) | Au1—S1 <sup>i</sup> | 2.3228 (7) | Au1—N3 <sup>i</sup>                  | 2.523 (2)  |
| Bond angles (°)                      |            |                     |            |                                      |            |
| P1—Au1—S1 <sup>i</sup>               | 158.79 (3) | C9—P1—Au1           | 115.05 (8) | Au1—S1 <sup>i</sup> —C2 <sup>i</sup> | 103.68 (9) |
| Au1—S1 <sup>i</sup> —N3 <sup>i</sup> | 75.54 (5)  |                     |            |                                      |            |

**Table S1.** Main bond distances [Å] and angles [°] for the complex  $[\text{Au}_2(\text{L}^1)_2]$ .



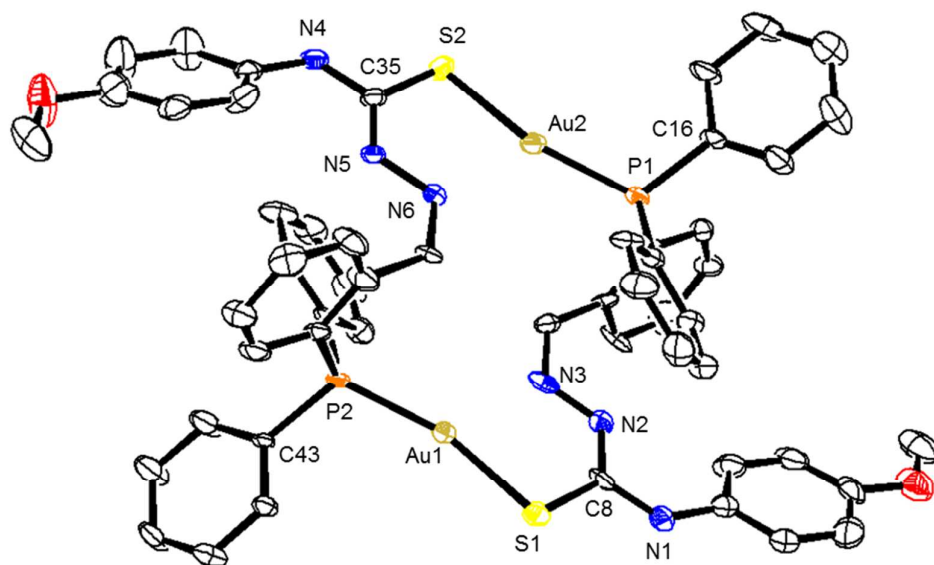

**Figure S4.** ORTEP depiction of the complex  $[\text{Au}_2(\text{L}^4)_2] \cdot 2\text{CH}_3\text{CN}$ . Hydrogen atoms and solvate acetonitrile molecules have not been depicted for clarity.

| Bond distances (Å) |             |            |           |            |           |
|--------------------|-------------|------------|-----------|------------|-----------|
| N3—Au1             | 2.497 (7)   | N6—Au2     | 2.474 (7) | P1—Au2     | 2.233 (3) |
| P2—Au1             | 2.226 (3)   | S1—Au1     | 2.326 (3) | S2—Au2     | 2.337 (3) |
| Bond angles (°)    |             |            |           |            |           |
| P2—Au1—S1          | 164.29 (10) | C43—P2—Au1 | 115.3 (4) | C8—S1—Au1  | 102.5 (4) |
| P1—Au2—S2          | 162.66 (10) | C35—S2—Au2 | 102.0 (4) | C16—P1—Au2 | 113.6 (3) |

**Table S2.** Main bond distances [Å] and angles [°] for the complex  $[\text{Au}_2(\text{L}^4)_2] \cdot 2\text{CH}_3\text{CN}$ .

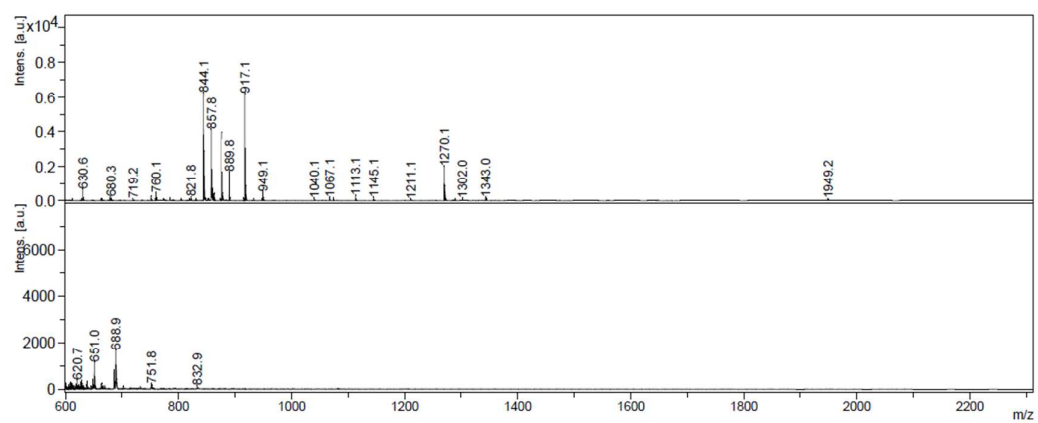

**Figure S5.** MALDI-TOF mass spectrum of  $[\text{Au}_2(\text{L}^1)_2]$ .

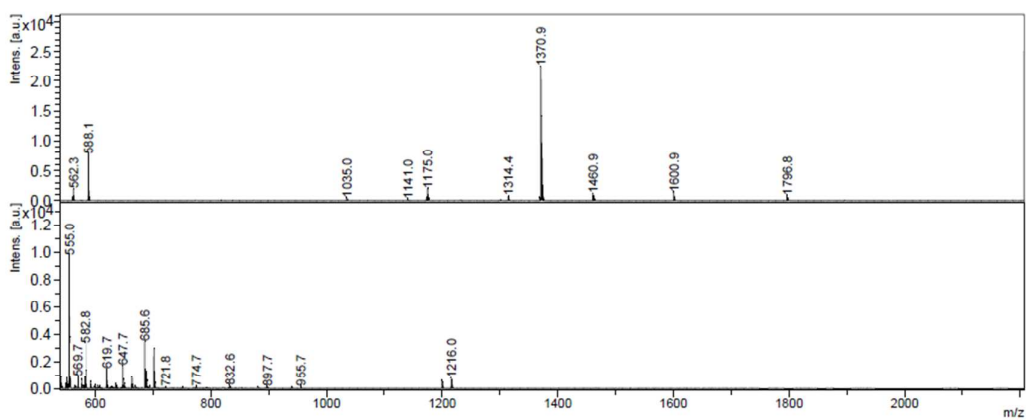

**Figure S6.** MALDI-TOF mass spectrum of  $[\text{Au}_2(\text{L}^2)_2] \cdot 2\text{H}_2\text{O}$ .

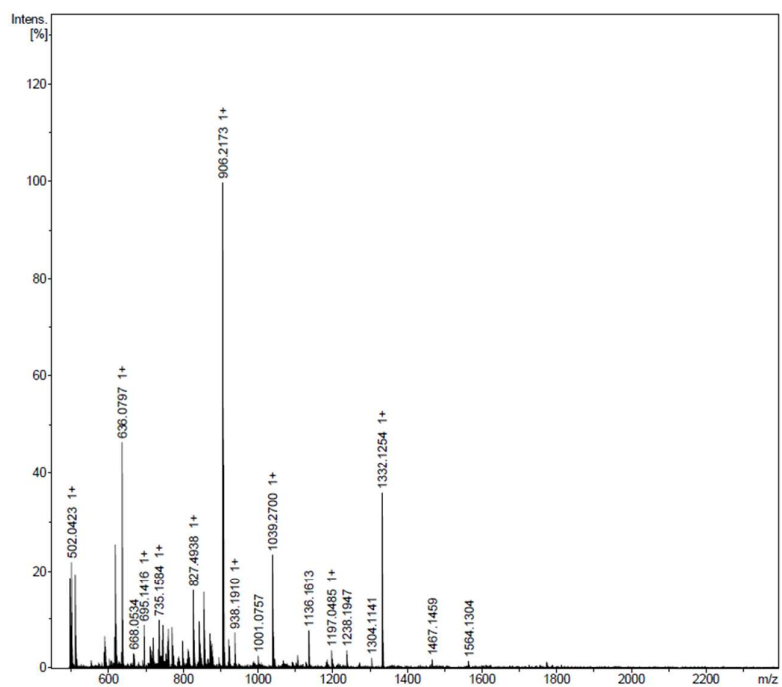

**Figure S7.** ESI<sup>+</sup> mass spectrum of  $[\text{Au}_2(\text{L}^3)_2]$ .

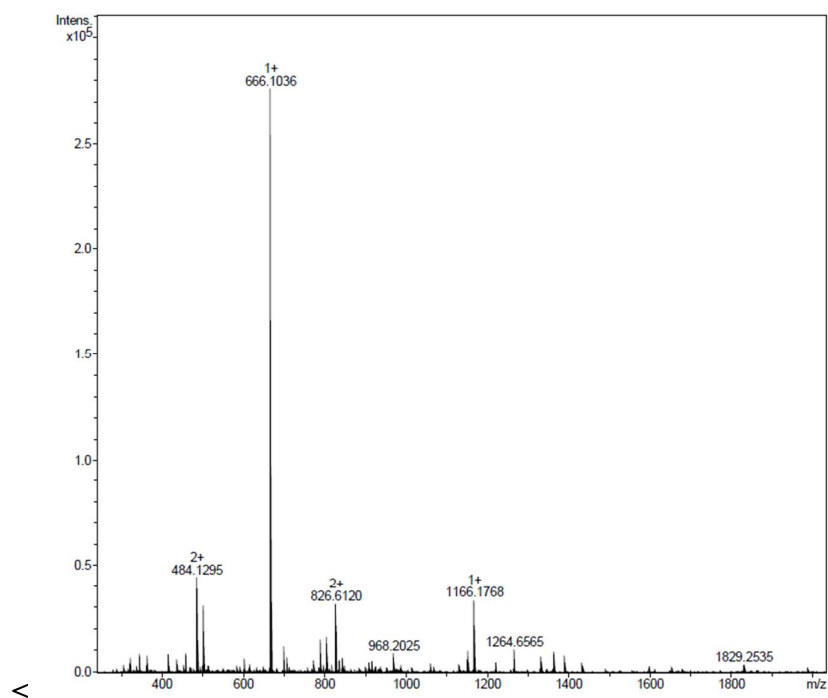

**Figure S8.** ESI-FIA-TOF<sup>+</sup> mass spectrum of  $[\text{Au}_2(\text{L}^4)_2] \cdot 2\text{CH}_3\text{CN}$ .

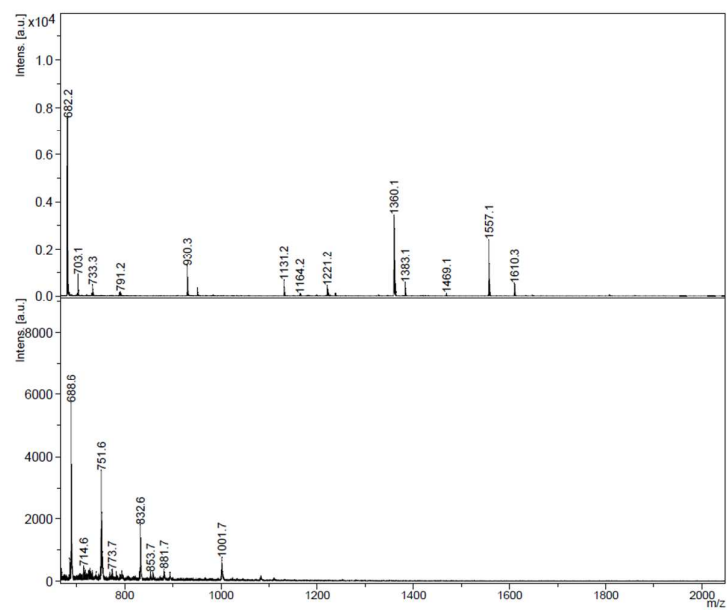

**Figure S9.** MALDI-TOF mass spectrum of  $[\text{Au}_2(\text{L}^5)_2]$

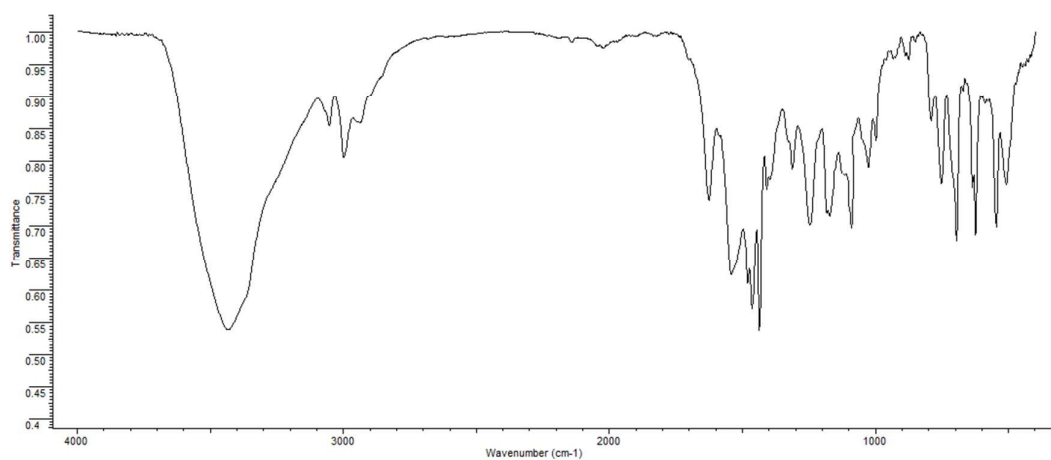

**Figure S10.** IR spectrum ( $\text{cm}^{-1}$ ) of  $[\text{Au}_2(\text{L}^1)_2]$ .

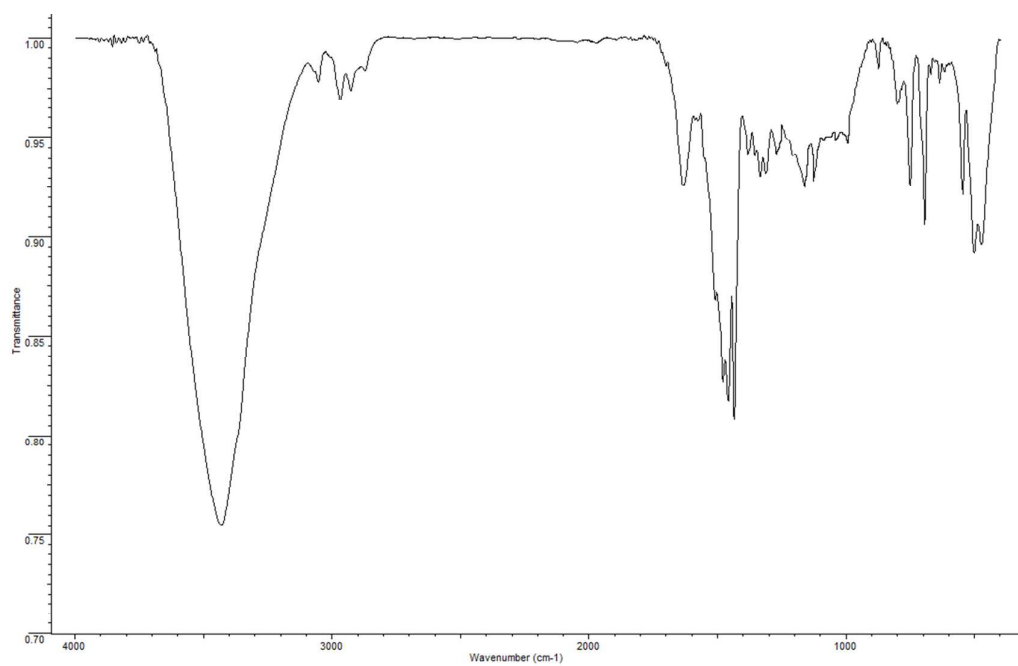

**Figure S11.** IR spectrum ( $\text{cm}^{-1}$ ) of  $[\text{Au}_2(\text{L}^2)_2] \cdot 2\text{H}_2\text{O}$ .

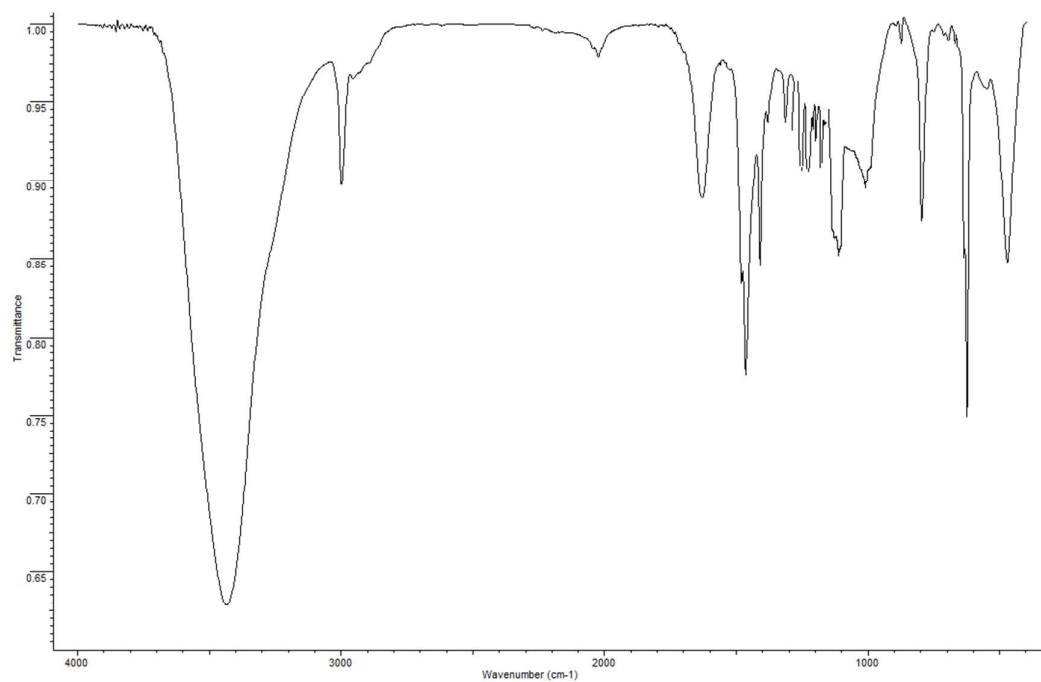

**Figure S12.** IR spectrum ( $\text{cm}^{-1}$ ) of  $[\text{Au}_2(\text{L}^3)_2]$ .

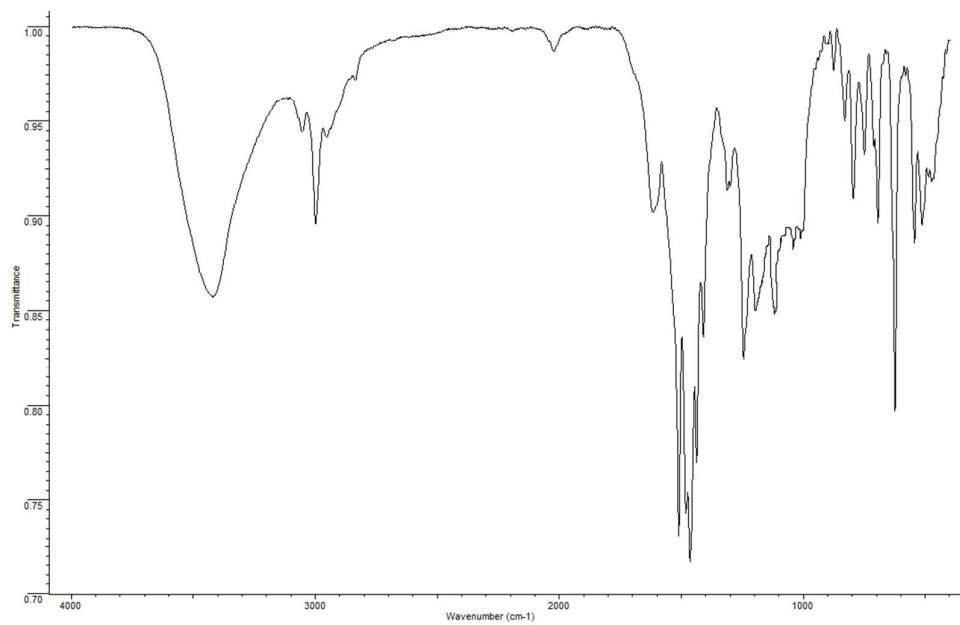

**Figure S13.** IR spectrum ( $\text{cm}^{-1}$ ) of  $[\text{Au}_2(\text{L}^4)_2] \cdot 2\text{CH}_3\text{CN}$ .

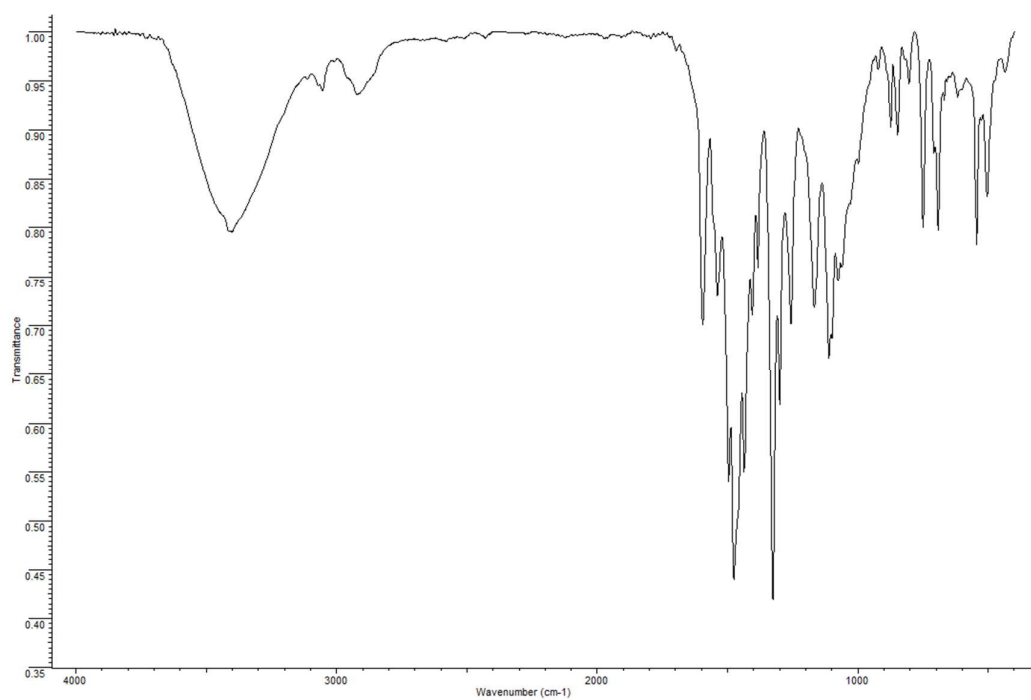

**Figure S14.** IR spectrum ( $\text{cm}^{-1}$ ) of  $[\text{Au}_2(\text{L}^5)_2]$ .

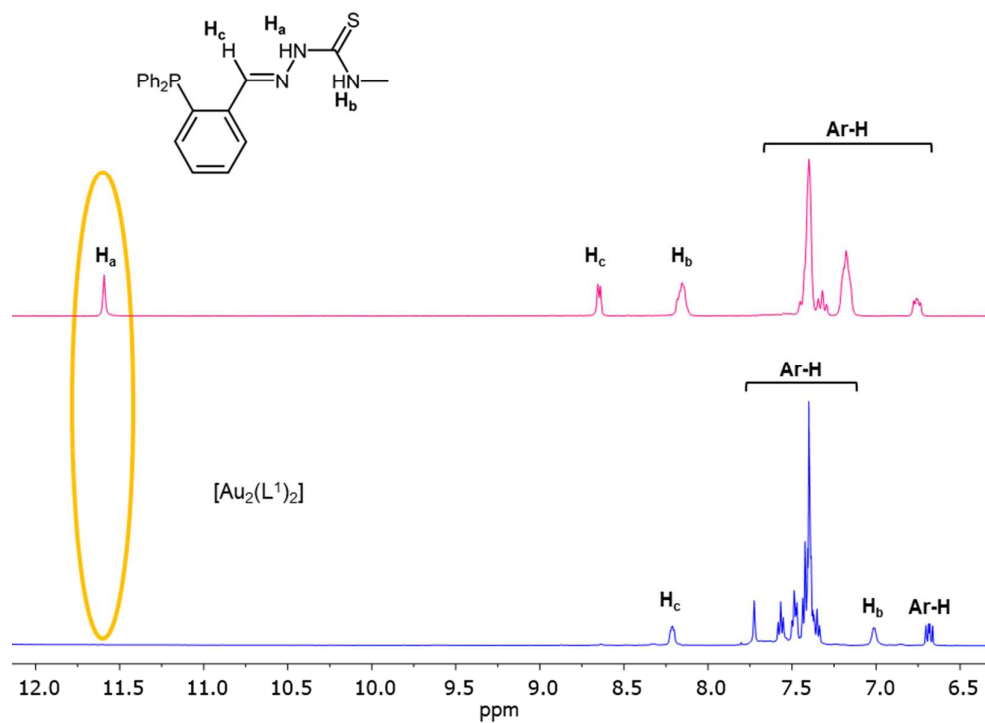

**Figure S15.** Overlapped  $^1\text{H}$  NMR spectra of the ligand  $\text{HL}^1$  (top) and the complex  $[\text{Au}_2(\text{L}^1)_2]$  (bottom). Red ellipsoid stresses the disappearance of the NH proton in the complex obtained by electrochemical synthesis.

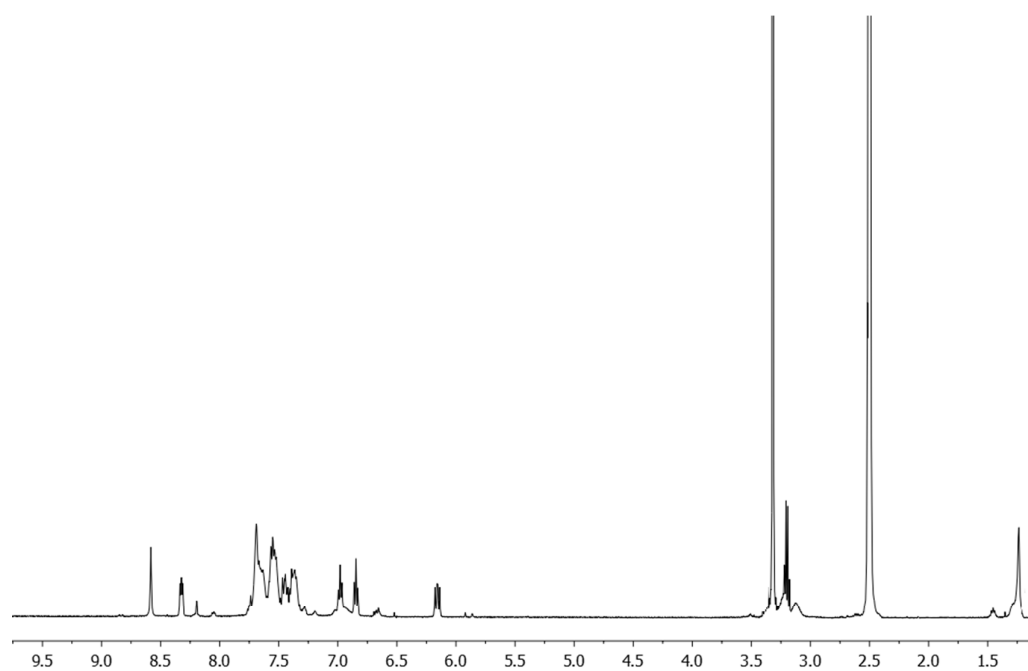

**Figure S16.**  $^1\text{H}$  NMR spectrum of  $[\text{Au}_2(\text{L}^2)_2] \cdot 2\text{H}_2\text{O}$ .



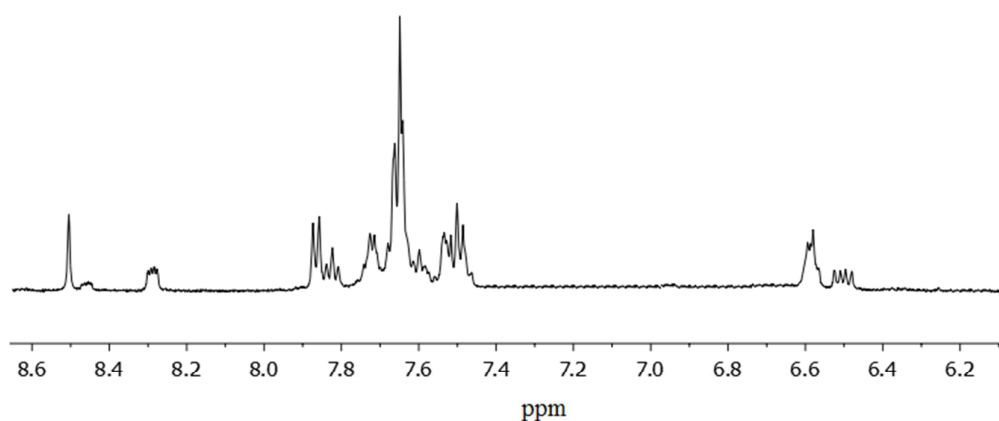

**Figure S17.**  $^1\text{H}$  NMR spectrum of  $[\text{Au}_2(\text{L}^3)_2]$ .

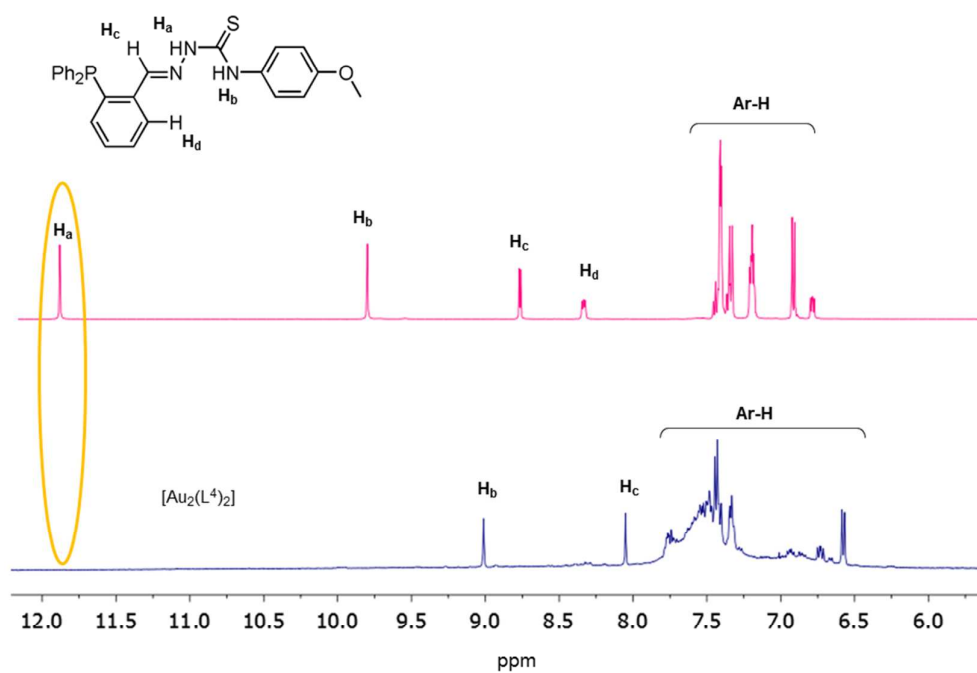

**Figure S18.** Overlapped  $^1\text{H}$  NMR spectra of the ligand  $\text{HL}^4$  (top) and the complex  $[\text{Au}_2(\text{L}^4)_2] \cdot 2\text{CH}_3\text{CN}$  (bottom). Red ellipsoid stresses the disappearance of the NH proton in the complex obtained by electrochemical synthesis.

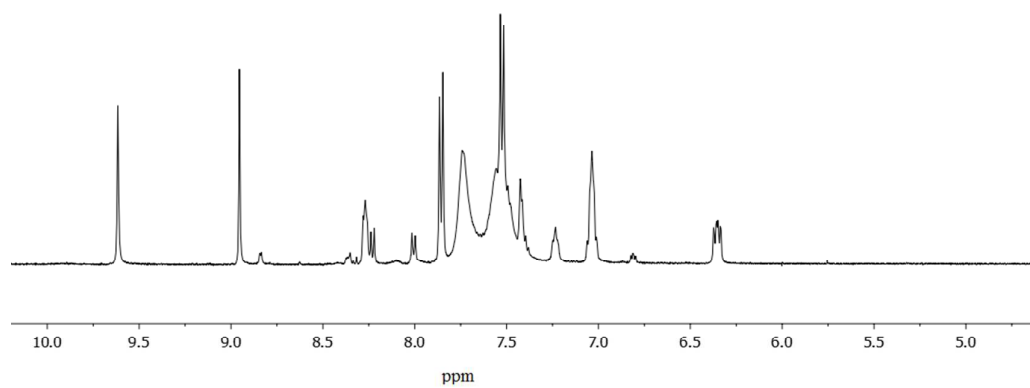

**Figure S19.**  $^1\text{H}$  NMR spectrum of  $[\text{Au}_2(\text{L}^5)_2]$ .

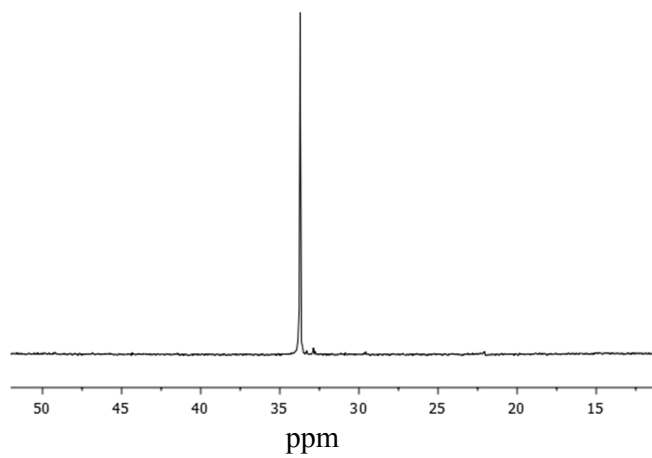

**Figure S20.**  $^{31}\text{P}$  NMR spectrum of  $[\text{Au}_2(\text{L}^1)_2]$ .

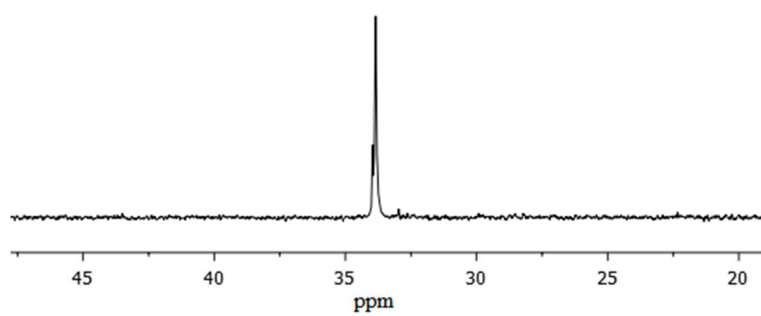

**Figure S21.**  $^{31}\text{P}$  NMR spectrum of  $[\text{Au}_2(\text{L}^2)_2] \cdot 2\text{H}_2\text{O}$ .

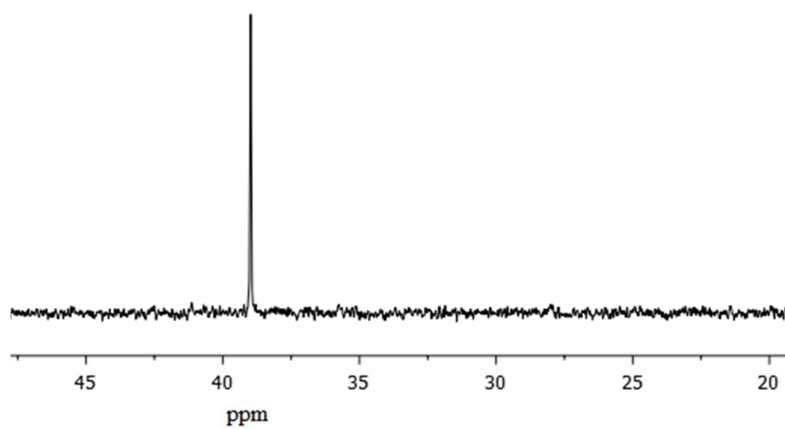

**Figure S22.**  $^{31}\text{P}$  NMR spectrum of  $[\text{Au}_2(\text{L}^3)_2]$ .

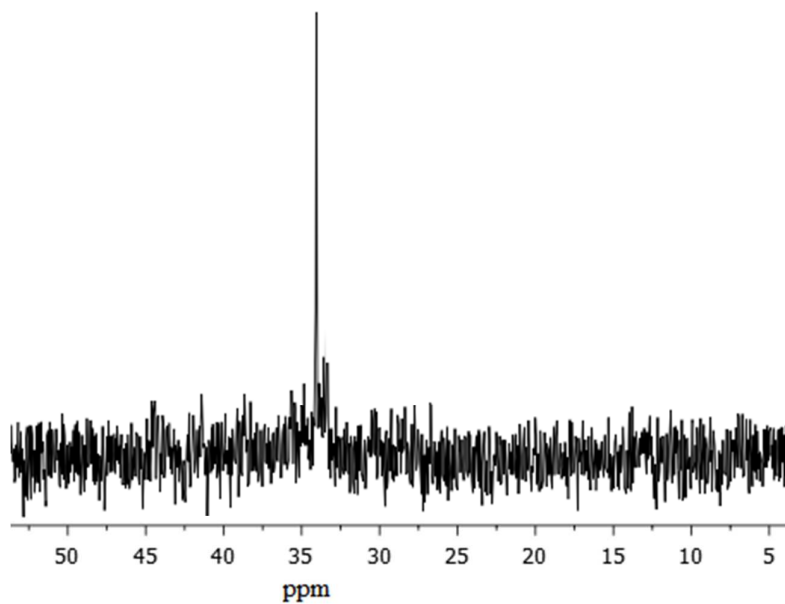

**Figure S23.**  $^{31}\text{P}$  NMR spectrum of  $[\text{Au}_2(\text{L}^4)_2] \cdot 2\text{CH}_3\text{CN}$ .

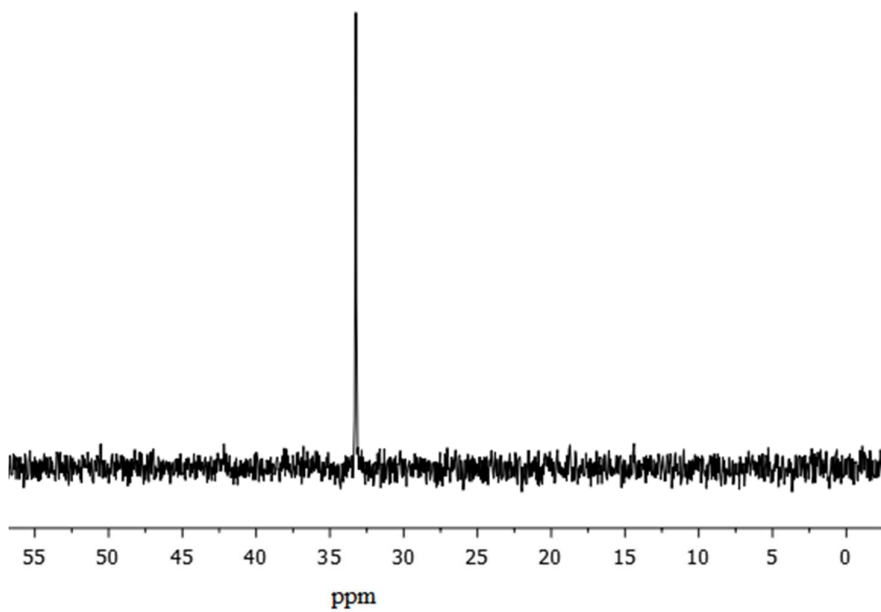

**Figure S24.**  $^{31}\text{P}$  NMR spectrum of  $[\text{Au}_2(\text{L}^5)_2]$ .

## References

- <sup>1</sup> A. Castiñeiras and R. Pedrido, *Dalton Trans.*, 2012, **41**, 1363.
- <sup>2</sup> a) A. Castiñeiras and R. Pedrido, *Inorg. Chem.*, 2009, **48**, 4847; b) A. Castiñeiras and R. Pedrido, *Dalton Trans.*, 2010, **39**, 3572.
- <sup>3</sup> A. Castiñeiras and R. Pedrido, *Inorg. Chem.*, 2008, **47**, 5534.
